# Supplementary material
Source: PubMed Central journal article supplement (PMC3725946)
Supplement: Supp_Fig1.pdf [file Supp_Fig1.pdf]

## Supplementary Data

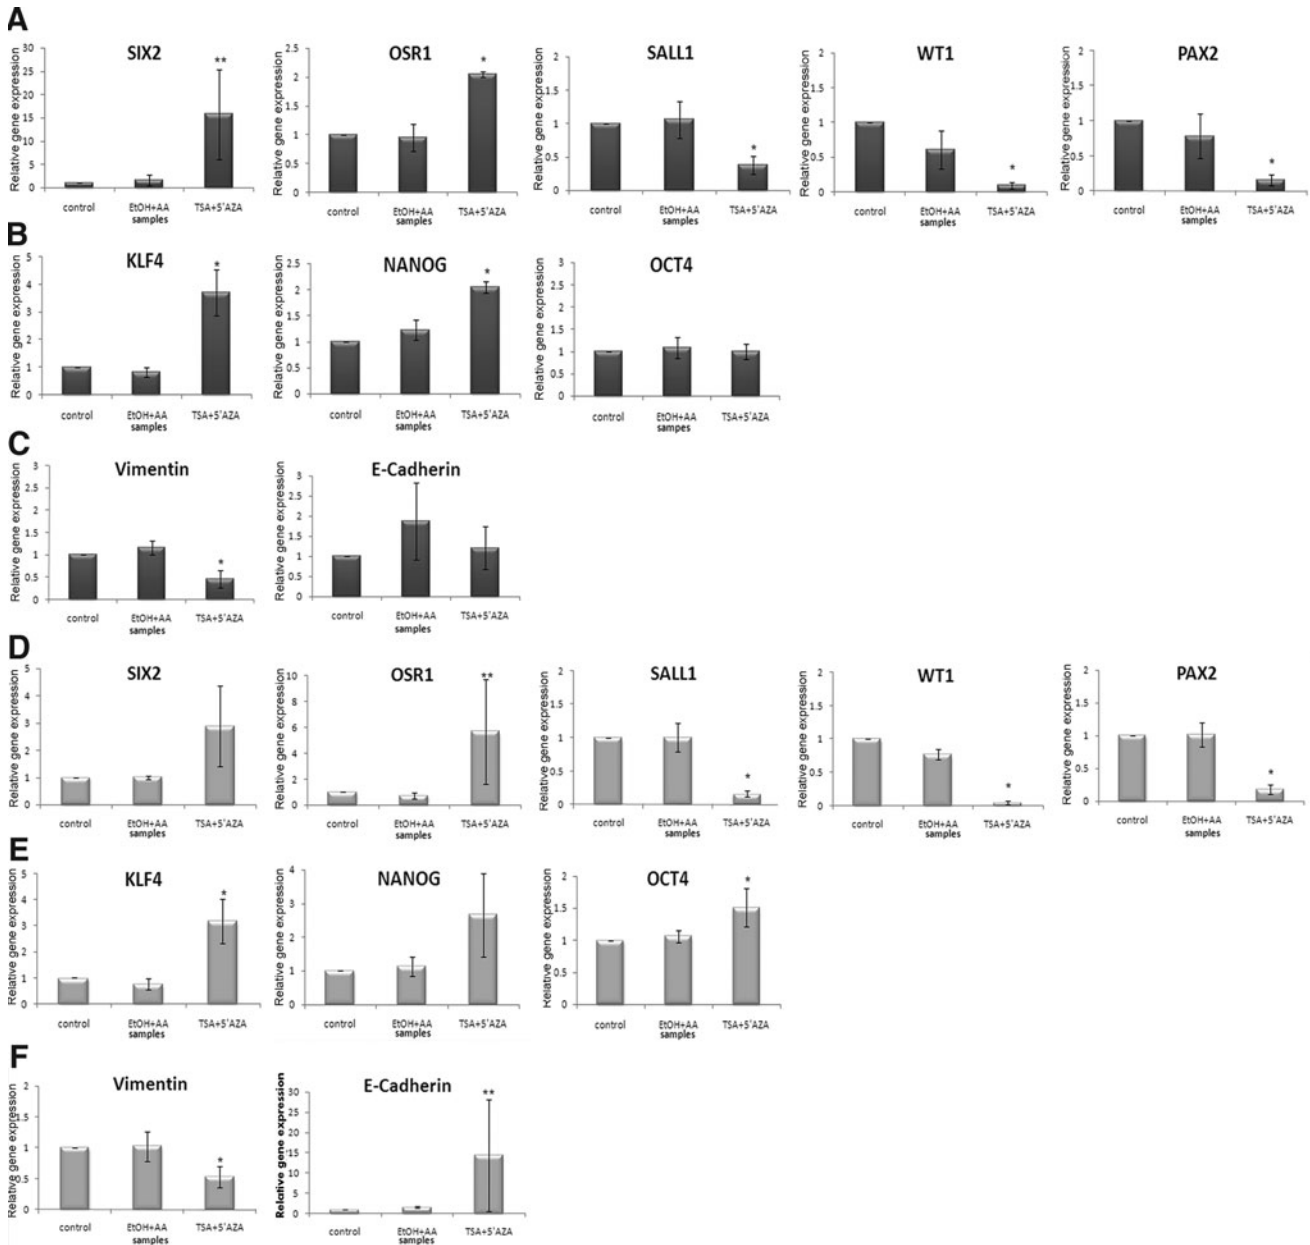

**SUPPLEMENTARY FIG. S1.** Effects of TSA/5-AzaC treatment. qRT-PCR analysis of hKEpC (A–C) and hFKC (D–F) subjected to TSA/5-AzaC (24 h). Shown are nephric progenitor (A, D), pluripotency/self renewal (B, E), and mesenchymal-to-epithelial transition (MET) (C, F) genes. At least three independent samples of human kidneys were used. The values for nontreated control-hFKC/hKEpC were used to normalize (therefore equal 1) and all other values were calculated with respect to them. Data were calculated as average  $\pm$  standard deviation (SD). (\*)  $p < 0.05$ ; (\*\*)  $p < 0.05$  after logarithmic transformation versus untreated controls.
